# Supplementary material for: Integrated Approach to Explore Multidimensional Urban Morphology of Informal Settlements: The Case Studies of Lahore, Pakistan
Source: MDPI journal article supplement (doi:10.3390/su14137788), 2022-06-26
Supplement: s1 [file s1]

***Socio-Economic Profiling of Informal settlements*****Questionnaire**

*Note: This interview is purely conducted for the research purpose. It doesn't have link with any other organization. The information delivered by interviewee will be kept confidential and it wouldn't be used for any other purpose.*

**Personal Information:****Name:****Age:****Gender:****Socio-Economic Information**

1. What is the household size? \_\_\_\_\_
2. What is the status of your house?
  - a) Owned
  - b) Rented (How much? \_\_\_\_\_)
  - c) Leased (years \_\_\_\_\_)
  - d) Other
3. Household Type?
  - a) Single
  - b) Nucleus
  - c) Joint
4. Level of education of the members of the household.

| Education Level  | Male | Female |
|------------------|------|--------|
| Illiterate       |      |        |
| Primary          |      |        |
| Secondary        |      |        |
| Graduate & Above |      |        |

**Livelihood Information**

5. What is Your occupation?
  - a) Laborer
  - b) Own Business
  - c) Public Employee
  - d) Private Employee
6. What is your monthly expenditure?
  - a) Below Rs. 10000
  - b) Rs. 10001 – Rs. 15000
  - c) Rs. 15001 – Rs. 20000
  - d) Rs. 20001 – Rs. 25000
  - e) Rs. 25001 and above
7. What is your monthly saving?
  - a) Below Rs. 5000
  - b) Rs. 5001 – Rs. 10000
  - c) Rs. 10001 – Rs. 15000
  - d) Rs. 15001 – Rs. 20000
  - e) Rs. 20001 and above

**8. Availability of infrastructural facilities.**

| Services               | Yes | No | If yes    |             |              |
|------------------------|-----|----|-----------|-------------|--------------|
|                        |     |    | Satisfied | Indifferent | Dissatisfied |
| Electricity            |     |    |           |             |              |
| Sanitation             |     |    |           |             |              |
| Safe water             |     |    |           |             |              |
| Solid Waste Management |     |    |           |             |              |
| Natural Gas            |     |    |           |             |              |
| Telephone Services     |     |    |           |             |              |

**9. What type of water used inside the house**

(A) Municipality tap (B) Community tap (C) Injector pump (D) Hand pump

**10. Do drains/sewers overflow during rainy season?**

(A) Yes (B) No

**11. Method of Solid Waste Disposal?**

(A) In front of House (B) Open dump (C) Collected by Municipality

(D) Other (Please specify) \_\_\_\_\_

**Historical Aspects**

12. What was the reason for settling in this area? \_\_\_\_\_

13. What was the allocation criteria? \_\_\_\_\_

14. How did you find that place for living? \_\_\_\_\_

15. What was the status of your tenure-ship when you moved? \_\_\_\_\_

16. From how much time you have been living here? \_\_\_\_\_

17. What government has done for the upgradation of your settlement? \_\_\_\_\_

18. What kind of support do you want from the government? \_\_\_\_\_

19. What kind of problems do you face in the katchi abadi? (on priority bases)

\_\_\_\_\_; \_\_\_\_\_; \_\_\_\_\_; \_\_\_\_\_

20. What kind of improvement you want in the katchi abadi? (on priority bases)

\_\_\_\_\_; \_\_\_\_\_; \_\_\_\_\_; \_\_\_\_\_

21. How you can contribute in the upgradation of katchi abadis? \_\_\_\_\_
